# Supplementary material for: Massive fungal biodiversity data re-annotation with multi-level clustering
Source: PubMed Central journal article supplement (PMC4213798; doi:10.1038/srep06837), 2014-10-30
Supplement: srep06837-s1.pdf [file srep06837-s1.pdf]

# Massive fungal biodiversity data re-annotation with multi-level clustering

Duong Vu<sup>1</sup>, Szániszló Szoke<sup>1</sup>, Christian Wiwie<sup>2</sup>, Jan Baumbach<sup>3</sup>, Gianluigi Cardinali<sup>4</sup>, Richard Röttger<sup>2,3</sup>, Vincent Robert<sup>1</sup>

<sup>1</sup>Bioinformatics group, CBS-KNAW Fungal Biodiversity Centre, Utrecht, The Netherlands

<sup>2</sup>Computational Systems Biology, Max Planck Institute for Informatics, Saarbrücken, Germany

<sup>3</sup>Institute for Mathematics and Computer Science, University of Southern Denmark, Odense, Denmark

<sup>4</sup>University of Perugia, Perugia, Italy

Supplementary Figure 1: F-Measures produced by MLC1 on Amidohydrolases protein sequences when the number of the sequences in each block is 200. The sequences were sorted in order of decreasing lengths. The threshold used for clustering is increased by steps of 0.01 ranging from 0 to 1. The best F-measures of MLC1 on this dataset when the representative sequences were chosen as the first sequence, the central sequence and the almost-central sequence are 0.9188, 0.93 and 0.942 respectively. It is noted that the almost-central sequence of a group was computed with  $k=10$ .

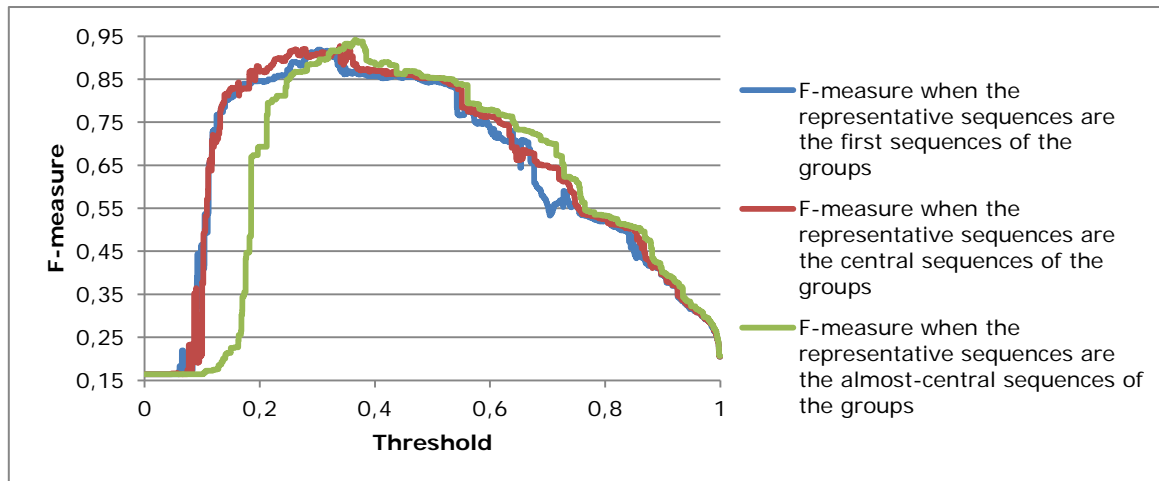

Supplementary Figure 2: F-Measures produced by MLC1 on medical fungal ITS sequences when the number of the sequences in each block is 200. The sequences were sorted in order of decreasing lengths. The threshold used for clustering is increased by steps of 0.01 ranging from 0.97 to 1. The best F-Measures of MLC1 on this dataset when the representative sequences were chosen as the first sequence, the central sequence and the almost-central sequence are 0.8666, 0.8753 and 0.8753 respectively. It is noted that the almost-central sequence of a group was computed with  $k=10$ .

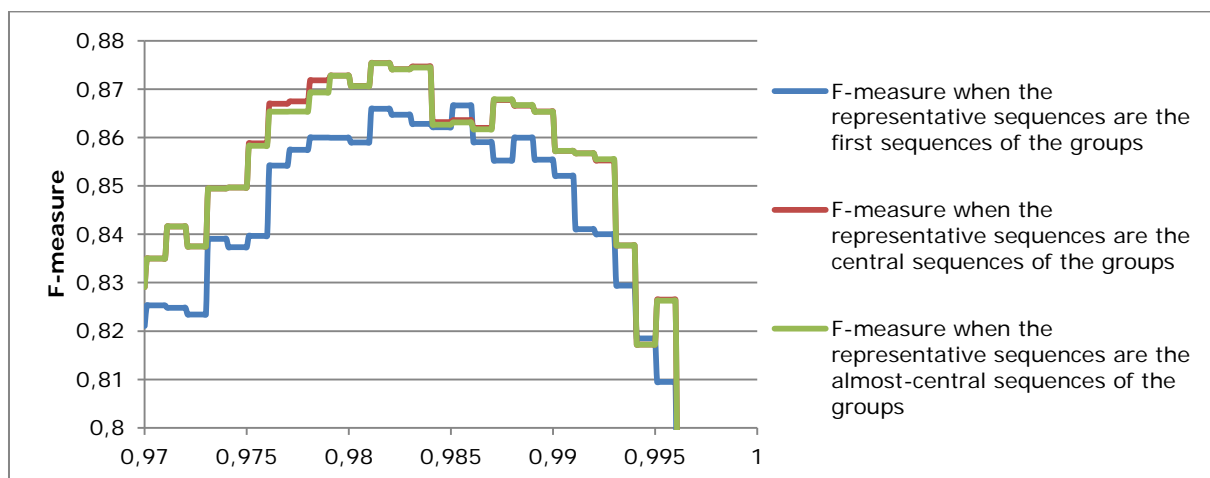

Supplementary Figure 3: Zooming in the quality ( $F$ -measure) of MLC1 clustering on Amidohydrolases protein sequences.

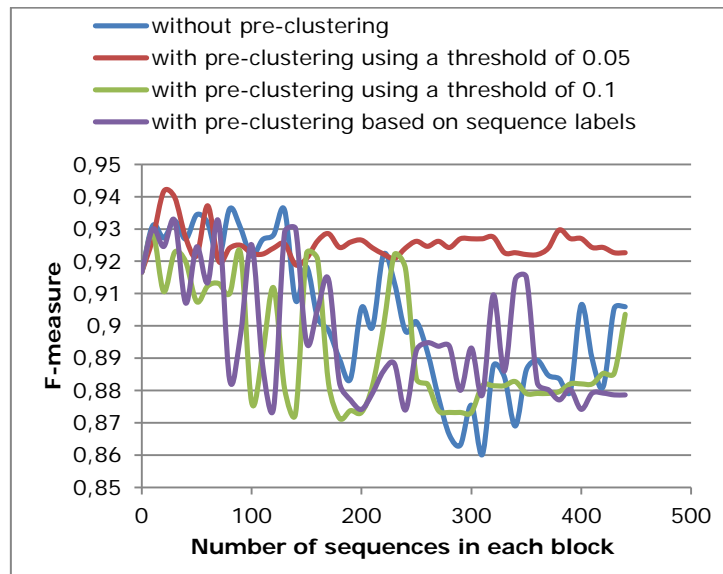

Supplementary Figure 4: Zooming in the quality ( $F$ -measure) of MLC1 clustering on the medical ITS reference sequences.

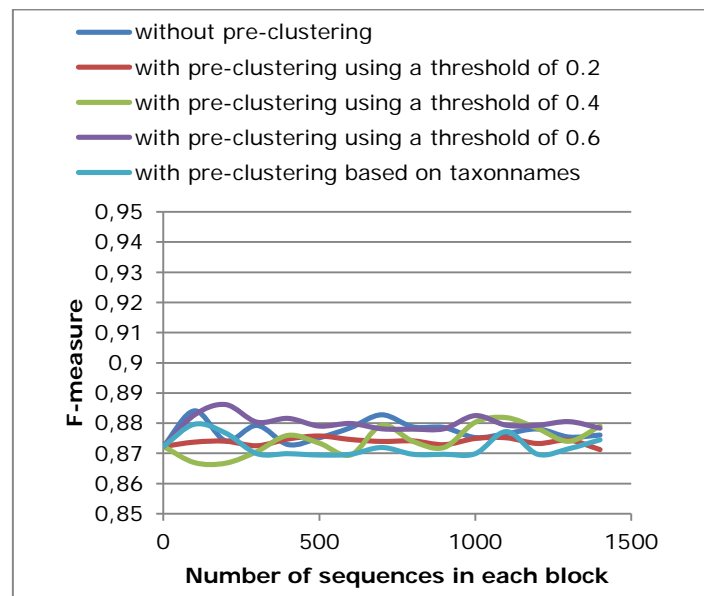

Supplementary Figure 5: Number of groups before and after clustering.

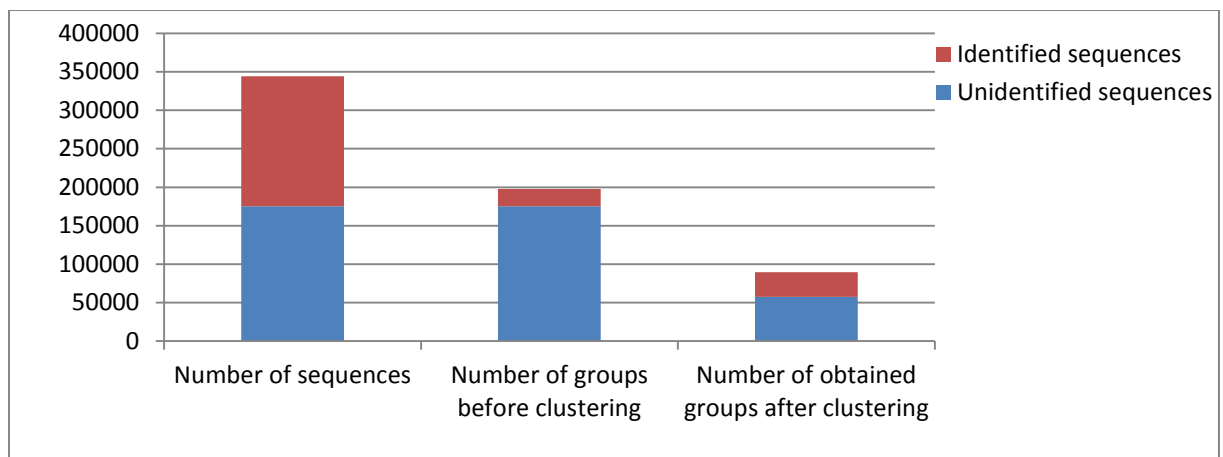

Supplementary Table 1: Results of rMLC with the threshold 0.95 where  $n$  is the number of sequences in each block.

|      | B1     | B2    | B3     | B4     | B5     | B6     | B7     | B8     | B9     | B10    |
|------|--------|-------|--------|--------|--------|--------|--------|--------|--------|--------|
| $n$  | 26,997 | 28,78 | 24,728 | 14,310 | 25,241 | 28,603 | 21,791 | 29,702 | 88,703 | 55,383 |
| Time | 23m    | 26m   | 20m    | 33m    | 30m    | 20m    | 21m    | 22m    | 2h15m  | 2h3m   |
